# Supplementary material for: Photocatalytic activity of ultrathin 2DPNs for enzymatically generating formic acid from CO2 and C–S/C–N bond formation
Source: Royal Society of Chemistry journal article supplement (doi:10.1039/d1se01103k), 2022-01-01
Supplement: d1se01103k1.pdf [file d1se01103k1.pdf]

## Electronic Supplementary Information (ESI)

### Photocatalytic Activity of Ultrathin 2DPNs for Enzymatically Formic Acid Generation from CO<sub>2</sub> and C-S/C-N Bonds Formation

Pooja Singh,<sup>a</sup> Rajesh K. Yadav,<sup>a,\*</sup> Chandani Singh,<sup>a</sup> Surabhi Chaubey,<sup>a</sup> Satyam Singh,<sup>a</sup> Atul P. Singh,<sup>b</sup> Jin-Oo K Baeg,<sup>c</sup> Tae Wu Kim,<sup>c,\*</sup> Dzhardimalieva Gulzhian<sup>d</sup>

<sup>a</sup>Department of Chemistry and Environmental Science, Madan Mohan Malaviya University of Technology, Gorakhpur, U.P. 273010, India. \*Email: [rajeshkr\\_yadav2003@yahoo.co.in](mailto:rajeshkr_yadav2003@yahoo.co.in)

<sup>b</sup>Department of Chemistry, Chandigarh University, Mohali, Punjab, 140413, India.

<sup>c</sup>Department of Chemistry, Mokpo National University, Muan-gun, Jeollanam-do, 58554, Republic of Korea. \*Email: [twkim@mokpo.ac.kr](mailto:twkim@mokpo.ac.kr)

<sup>d</sup>Institute of Problems of Chemical Physics of RAS, acad. Semenov av. 1, Chernogolovka, Moscow region, 142432, Russia.

<sup>e</sup>Korea Research Institute of Chemical Technology, Advanced Chemical Technology Division 100 Jang-Dong, Yusong Daejeon. KR 305-600.

## Table of Content

|                                                                                                                                |         |
|--------------------------------------------------------------------------------------------------------------------------------|---------|
| 1. General remarks .....                                                                                                       | S3      |
| 2. Instruments and measurements.....                                                                                           | S3      |
| 3. Synthesis of 2DPNs photocatalyst .....                                                                                      | S3-S4   |
| 4. Zeta potential analysis .....                                                                                               | S5      |
| 5. Reusability test of 2DPNs photocatalyst for photocatalytic NADH regeneration and formic acid production .....               | S5      |
| 6. Reusability test of 2DPNs photocatalyst for the synthesis of 2-Substituted BT .....                                         | S6      |
| 7. Table S1: A Comparative reported literature survey for NADH regeneration and CO <sub>2</sub> to formic acid production..... | S6      |
| 8. Transmission electron microscopy .....                                                                                      | S7      |
| 9. XRD analysis.....                                                                                                           | S8      |
| 10. Characterizations of 2DPNs photocatalyst after recycled experiment.....                                                    | S8-S9   |
| 11. HPLC experiment.....                                                                                                       | S9      |
| 12. Wavelength-dependent photocatalytic activity of the 2DPNs photocatalyst.....                                               | S10     |
| 13. <sup>1</sup> HNMR and <sup>13</sup> CNMR spectra of 2-substituted benzothiol compound.....                                 | S11-S13 |
| 14. R <sub>f</sub> value and image of synthesized 2-Substituted BT compounds.....                                              | S14-S18 |
| 15. References.....                                                                                                            | S19-S21 |

### 1. General remarks

Propionic acid, benzaldehyde, pyrrole, chloroform, methanol, formate dehydrogenase, thiophenol, 2-mercaptopyridine, 2-amino-thiophenol, 4-chlorothiophenol,  $\text{NaH}_2\text{PO}_4 \cdot 2\text{H}_2\text{O}$ ,  $\text{Na}_2\text{HPO}_4 \cdot 2\text{H}_2\text{O}$ ,  $\text{NAD}^+$ , 4-bromomethylbenzotrile, 1,4-dicyanobenzene, 4-aminobenzotrile were purchased from sigma-aldrich. The organometallic mediator (Rh),  $[\text{Cp}^*\text{Rh}(\text{bpy})\text{Cl}]\text{Cl}$ , ( $\text{Cp}^* = \eta^5\text{-C}_5\text{Me}_5$ ,  $\text{bpy} = 2,2\text{-bipyridyl}$ ) was synthesized by reported literature method.<sup>1</sup>

### 2. Instruments and measurements

UV-visible absorption spectra were recorded on Shimazu spectrophotometer. Fourier transform infrared (FT-IR) spectra were recorded on a Bruker ALPHA-T FT-IR spectrometer. Nano-zetasizer (NYS90) was used for the measurements of zeta-potential and particle size. Crystallinity and d-spacing were study by Powder X-ray diffractometer (Bruker, D8 Advance Eco). The molecular structure of the 2-substituted benzothiol compound was confirmed by  $^1\text{H}$  NMR and  $^{13}\text{C}$  NMR spectra.

### 3. Synthesis of 2DPNs photocatalyst

#### Step-I. Synthesis of 5,10,15,20-tetraphenyl-porphyrin (TPP)

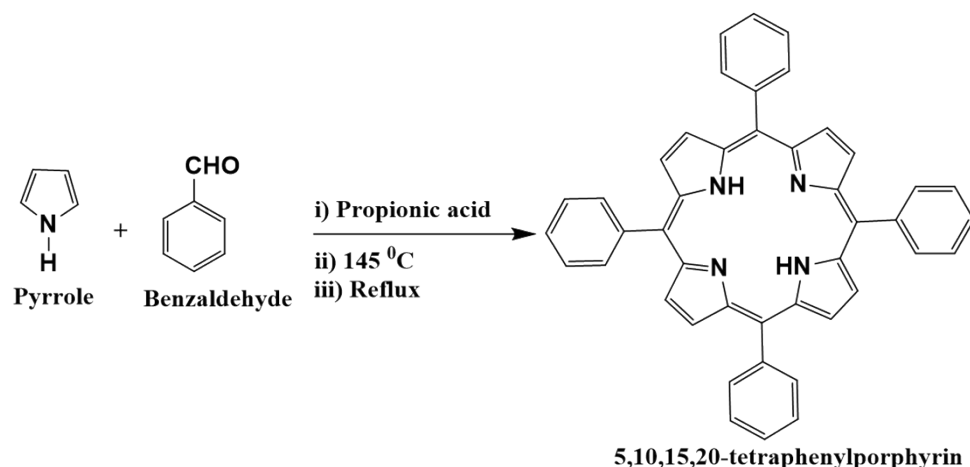

**FigureS1:** Synthesis of TPP monomer.

## Step-II. Synthesis of 2DPNsphotocatalyst

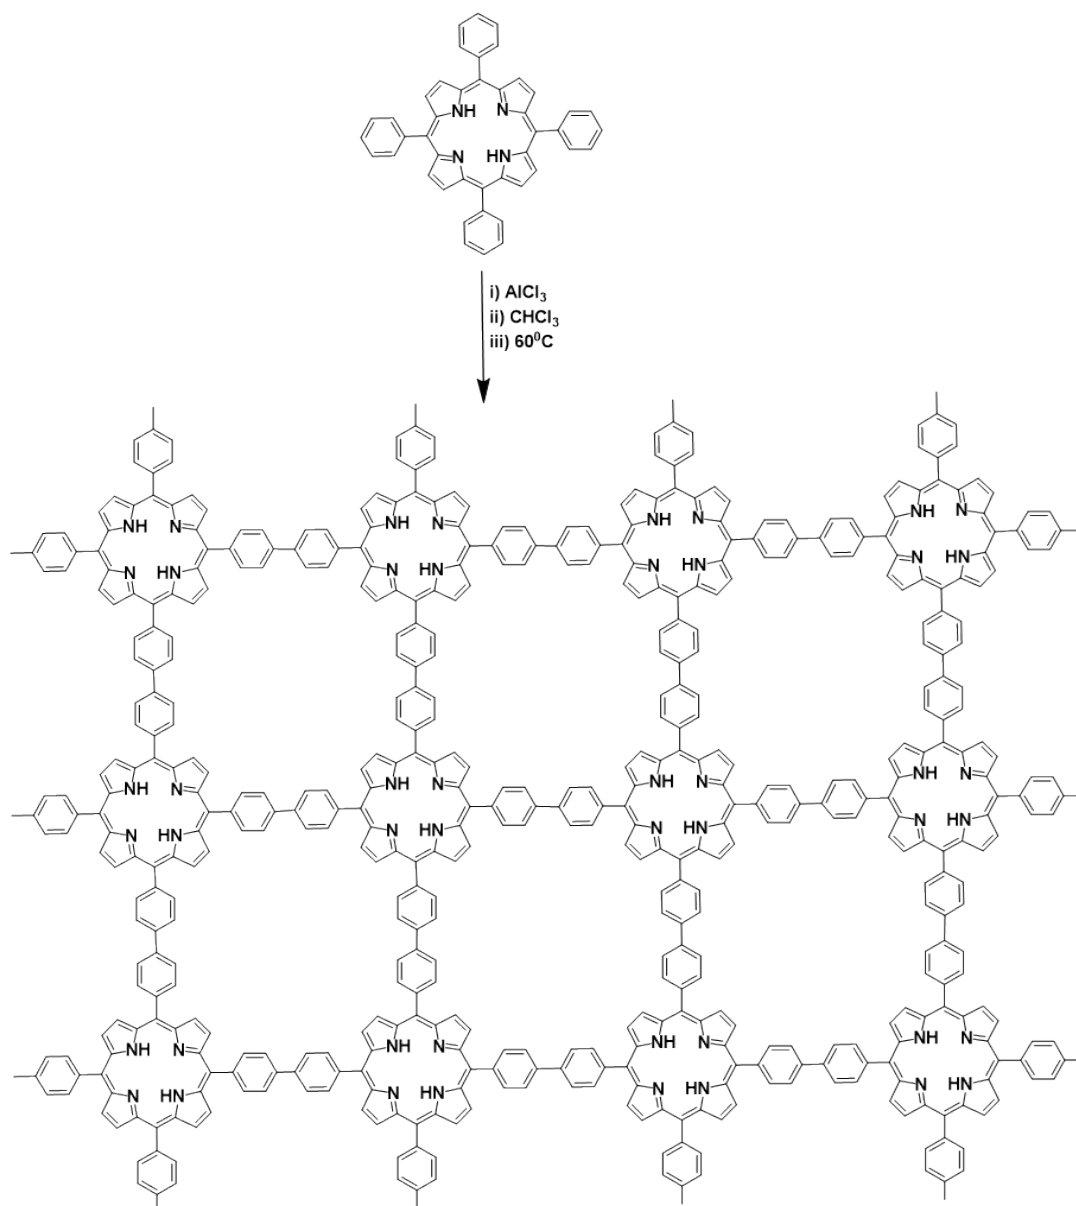

**Figure S2:** Synthesis of newly designed 2DPNsphotocatalyst for  $\text{CO}_2$  to formic acid production and synthesis of 2-substituted BT.

#### 4. Zeta potential analysis

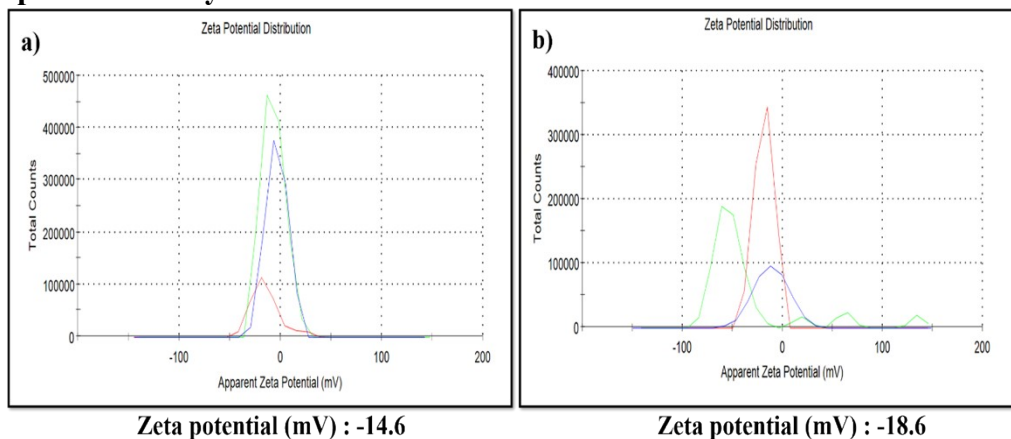

**Figure S3.** Zeta potential analysis of (a) TPP, and (b) 2DPNs photocatalysts.

#### 5. Reusability test of 2DPNs photocatalyst for photocatalytic NADH regeneration and formic acid production:

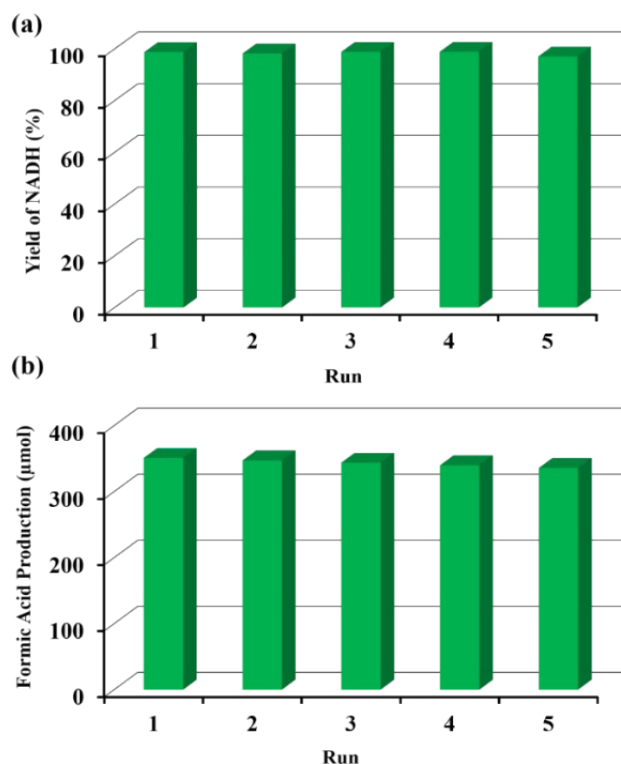

**Figure S4.** Reusability test of 2DPNs photocatalyst for (a) NADH regeneration, and (b) formic acid production up to fifth cycles. The photocatalysis was carried out using 2DPNs photocatalyst (2 mg) by illuminating the quartz reactor containing  $\text{NAD}^+$  (248  $\mu\text{L}$ ), rhodium

complex (124  $\mu\text{L}$ ) and AsA (310  $\mu\text{L}$ ) in 3.1 mL of buffer solution (0.1M, pH~ 7.0). The formic acid production was performed in presence of format dehydrogenase (50  $\mu\text{L}$ ).

#### 6. Reusability test of 2DPNs photocatalyst for synthesis of 2-substituted BT

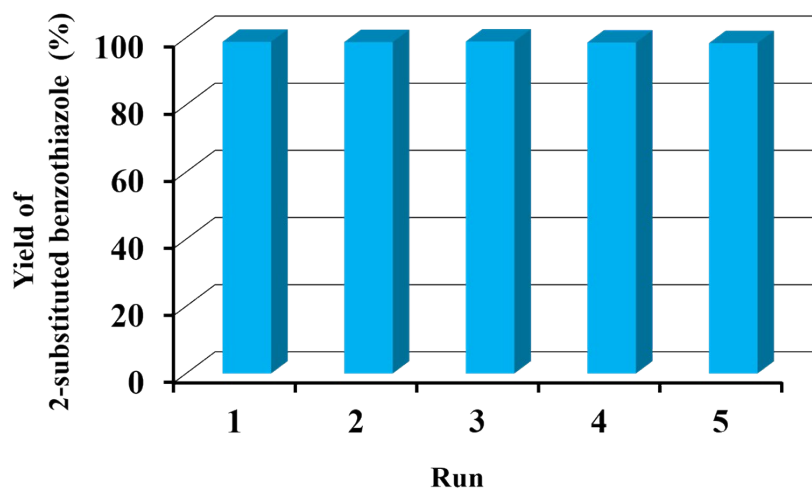

**Figure S5:** Reusability test of 2DPNs photocatalyst for synthesis of 2-substituted BT for 5 cycles. Reaction conditions: Tp (2eq.), N (1eq.), 2DPNs photocatalyst (5mg), DMSO (2 mL), 20 W blue LED lamps, rt, air, 12 h.

**7. Table S1: A Comparative reported literature survey for NADH regeneration and CO<sub>2</sub> to formic acid production.**

| Entry | Photocatalysts                                                 | Method          | NADH regeneration (%) | Formic acid ( $\mu\text{mol}$ ) | Time (h) | Fine chemical synthesis yield (%) | Ref. |
|-------|----------------------------------------------------------------|-----------------|-----------------------|---------------------------------|----------|-----------------------------------|------|
| 1.    | COF-367-Coll                                                   | Photochemical   | .....                 | 3.89                            | 8        | .....                             | 2    |
| 2.    | COF-367-CollII                                                 | Photochemical   | .....                 | 7.44                            | 8        | .....                             | 2    |
| 3.    | f-GQDs                                                         | Photochemical   | 74.95                 | 198.96                          | 2        | .....                             | 3    |
| 4.    | ATCN-DSCN                                                      | Photochemical   | 74.02                 | 290.4                           | 9        | .....                             | 4    |
| 5.    | W <sub>2</sub> Fe <sub>4</sub> Ta <sub>2</sub> O <sub>17</sub> | Photochemical   | 60.0                  | .....                           | 14       | .....                             | 5    |
| 6.    | CdTe Nanocrystals                                              | Photochemical   | 55                    | .....                           | 2        | .....                             | 6    |
| 7.    | CdS Nanocrystals                                               | Photochemical   | 53                    | .....                           | 2        | .....                             | 6    |
| 8.    | CdSe Nanocrystals                                              | Photochemical   | 30                    | .....                           | 2        | .....                             | 6    |
| 9.    | NG-Co <sub>3</sub> O <sub>4</sub> -40                          | Electrochemical | .....                 | 198.96                          | 1        | .....                             | 7    |
| 10.   | Ru/mpg-C <sub>3</sub> N <sub>4</sub>                           | Photochemical   | .....                 | 19.34                           | 5        | .....                             | 8    |
| 11.   | RuP/C <sub>3</sub> N <sub>4</sub>                              | Photochemical   | .....                 | 8.8                             | 1        | .....                             | 9    |
| 12.   | Fmoc-FF/g-C <sub>3</sub> N <sub>4</sub>                        | Photochemical   | 62.7                  | .....                           | 3        | .....                             | 10   |
| 13.   | CaLa <sub>4</sub> Ti <sub>4</sub> O <sub>15</sub>              | Electrochemical | .....                 | 1.8                             | 1        | .....                             | 11   |
| 14.   | Hierarchical Cu pillar electrode                               | Electrochemical | .....                 | 13.17                           | 6        | .....                             | 12   |
| 15.   | 2D PNs                                                         | Photochemical   | 97.76                 | 350.16                          | 2        | 99.7                              |      |

## 8. Transmission electron microscopy (TEM)

To examine the morphology of the as-synthesized 2DPNs, we implemented the measurement using transmission electron microscopy (TEM). TEM images were collected by TECNAI G<sup>2</sup> F30 microscope (FEI company) operated at 300 keV. By using the same equipment, the high-resolution TEM images (HR-TEM) were collected. As shown in Figure S6a, the wide-view TEM image of 2DPNs powder shows the clear rectangular shapes with the sharp edges. The HR-TEM image shows the periodically aligned patterns around the edge of microcrystal, corresponding to the well-aligned layered structure. For the systematic characterization, we performed the fast Fourier transformation (FFT) of the ROI region indicated in Figure S6b. Based on the result from the FFT analysis, it can be learned that the spacing between the periodic lines is about 0.24 nm and the distance of 0.24 nm corresponds to the distance between the stacked 2D layers in the 2DPNs.

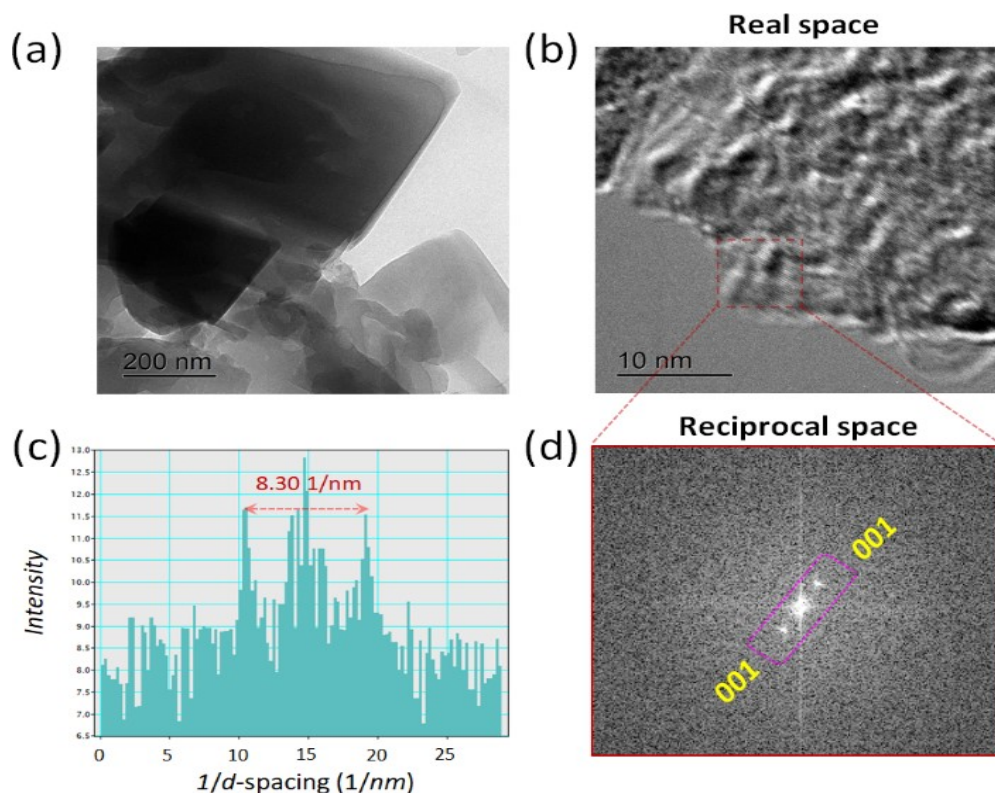

**Figure S6.** Transmission electron microscopy (TEM) measurement of 2DPNs. (a) TEM image of 2DPNs in powder form. (b) High-resolution TEM image. The region, indicated by the red dashed box, clearly shows the lattice patterns with several tens layers. (c, d) Results from the fast Fourier transformation (FFT) of the red dashed region in (b). (c) Profile plot of the area indicated by the magenta rectangle in (d). (d) Two-dimensional FFT image. The Bragg peaks for (001) planes with the spacing of 0.24 nm are seen. This value corresponds to the distance between the stacked 2D layers.

## 9. XRD analysis

To study the crystallinity and d-spacing value the as-synthesized 2DPNs photocatalyst, we performed the powder X-ray diffraction techniques. As depicted in Figure S7, the data from the measurement of powder X-ray diffraction (PXRD) of 2DPNs photocatalyst exhibited the XRD pattern around  $21.5^\circ$ , which refers to the interlayer stacking with the d-spacing of 0.4032 nm. In the small-angle region, the peak around  $2.02^\circ$  and  $8.16^\circ$  are attributed to the characteristic structure of 2D covalent organic frameworks.<sup>13-14</sup>



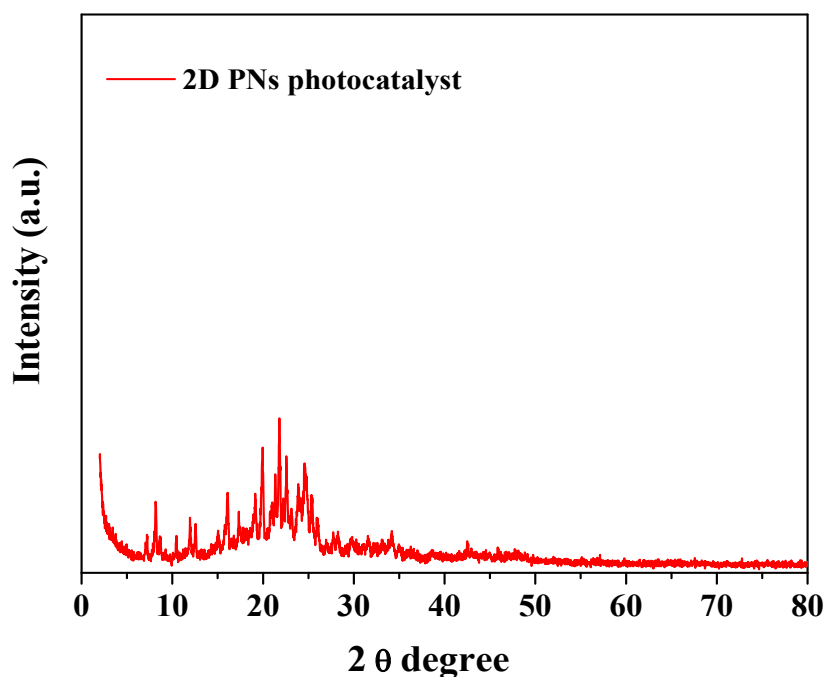

**Figure S7:** XRD analysis of 2D PN photocatalyst.

#### **10. Characterizations of 2DPNs photocatalyst after recycled experiment**

To investigate the structures and stability of the 2DPNs photocatalyst after the photocatalytic reactions, we have characterised the 2DPNs photocatalyst afterward the recycled experiment through the XRD, FTIR and SEM analysis. As depicted in Figure S8, there is no difference exist in between two XRD (Figure S8a), FTIR (Figure S8b) and SEM analysis (Figure S8d), respectively. As a result, the molecular structure (XRD and FTIR analysis) and surface morphology (Figure S8d) of the 2DPNs photocatalyst was remain same before and after the photocatalytic reactions (Figure S8a and S8b).

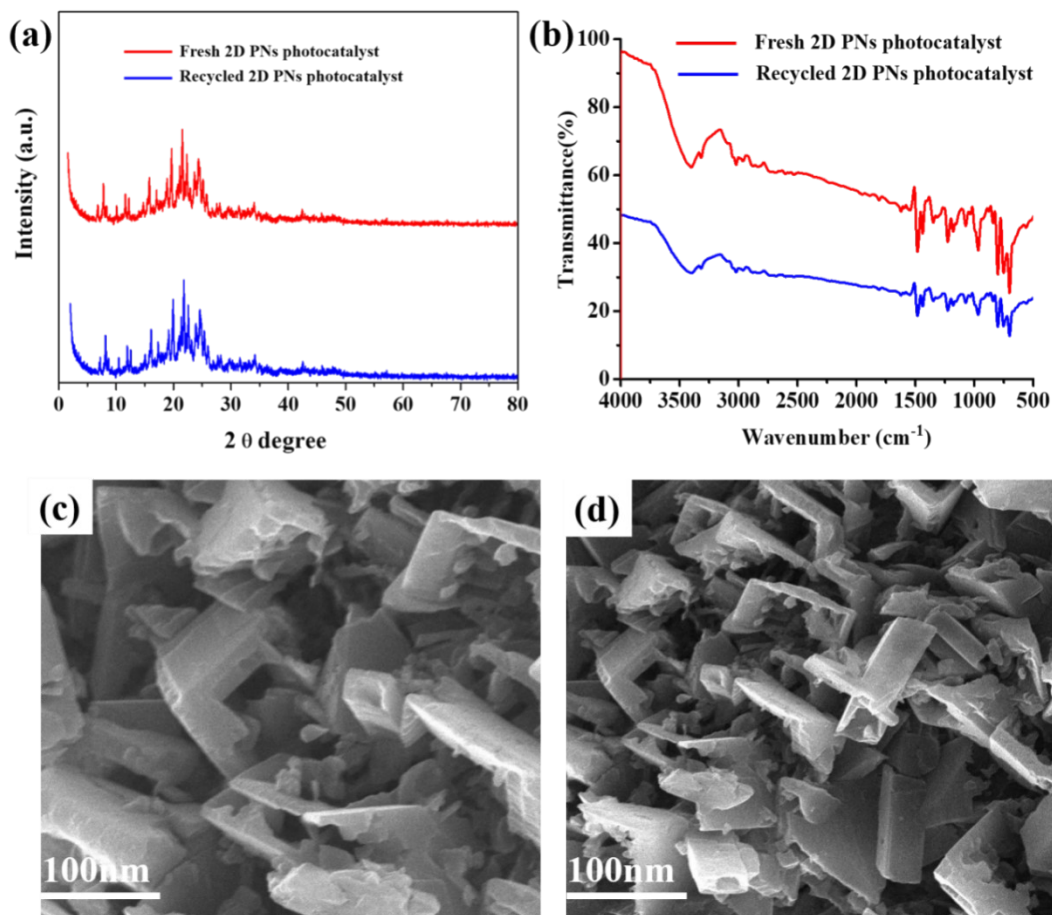

**Figure S8:** (a) XRD analysis of fresh and recycled 2DPNs photocatalyst (b) FTIR analysis of fresh and recycled 2DPNs photocatalyst (c) SEM analysis of fresh 2DPNs photocatalyst (d) SEM analysis of recycled 2DPNs photocatalyst.

### 11. HPLC (High performance liquid chromatography) experiment

We have performed the HPLC experiment to confirmed the formic acid (HCOOH) in the solution of 50% formic acid and methanol as shown in Figure S9a. We have also performed the HPLC experiment to confirmed the CO<sub>2</sub> conversion into formic acid (HCOOH) in the reaction mixture as shown in Figure S9b.<sup>15</sup>

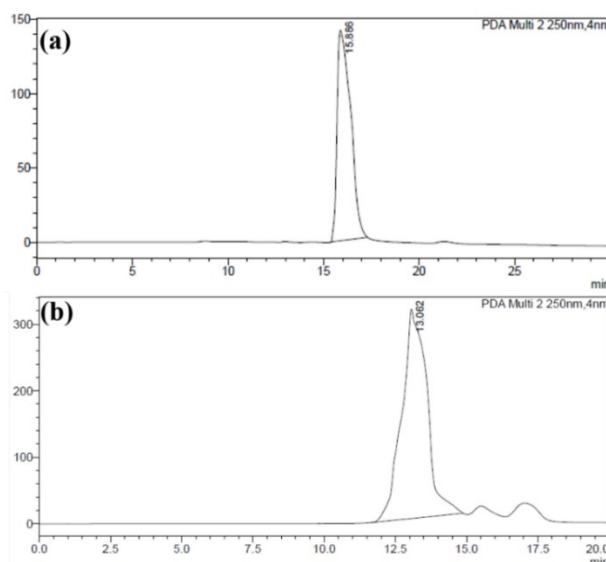

**Figure S9.** (a) Chromatogram of 50% formic acid solution in methanol (b) Chromatogram of formic acid (HCOOH) from CO<sub>2</sub> solution (2DPNs photocatalyst (31 μL), NAD<sup>+</sup> (248 μL), rhodium complex (124 μL), AsA (310 μL) and formate dehydrogenase enzyme (50 μL) in 3.1 mL of buffer solution).

### 12. Wavelength-dependent photocatalytic activity of the 2DPNs photocatalyst

As shown in Figure S10, the photocatalytic performance of the 2DPNs photocatalyst for CO<sub>2</sub> reduction is further studied by light irradiation of various wavelengths controlled by the specific long-pass cut-off filters such as 420 nm, 450 nm, 500 nm, etc. The generation of formic acid correlates with the light-harvesting absorption spectrum of the 2DPNs photocatalyst as per the reported paper,<sup>16-19</sup> revealing that the CO<sub>2</sub> reduction reaction is a photocatalytic process.

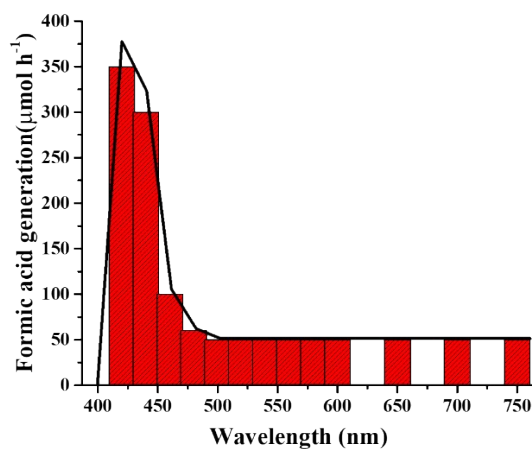

**Figure.S10** Wavelength-dependent photocatalytic activity of the 2DPNs photocatalyst for CO<sub>2</sub> reduction reactions.

### 13. <sup>1</sup>H NMR and <sup>13</sup>C NMR spectra of 2-substituted benzothiol compound

#### (i) <sup>1</sup>H NMR and <sup>13</sup>C NMR of 4-(thiazolo[5,4-b] pyridin-2-yl) aniline

<sup>1</sup>H NMR (CDCl<sub>3</sub>, 500 MHz): δ 8.43-8.10 (d, 1H), 7.65-7.63 (d, 1H), 7.59-7.57 (m, 1H), 6.67-6.65 (s, 2H); <sup>13</sup>C NMR (CDCl<sub>3</sub>, 500 MHz): δ 170.39, 148.86, 138.95, 133.81, 126.39.

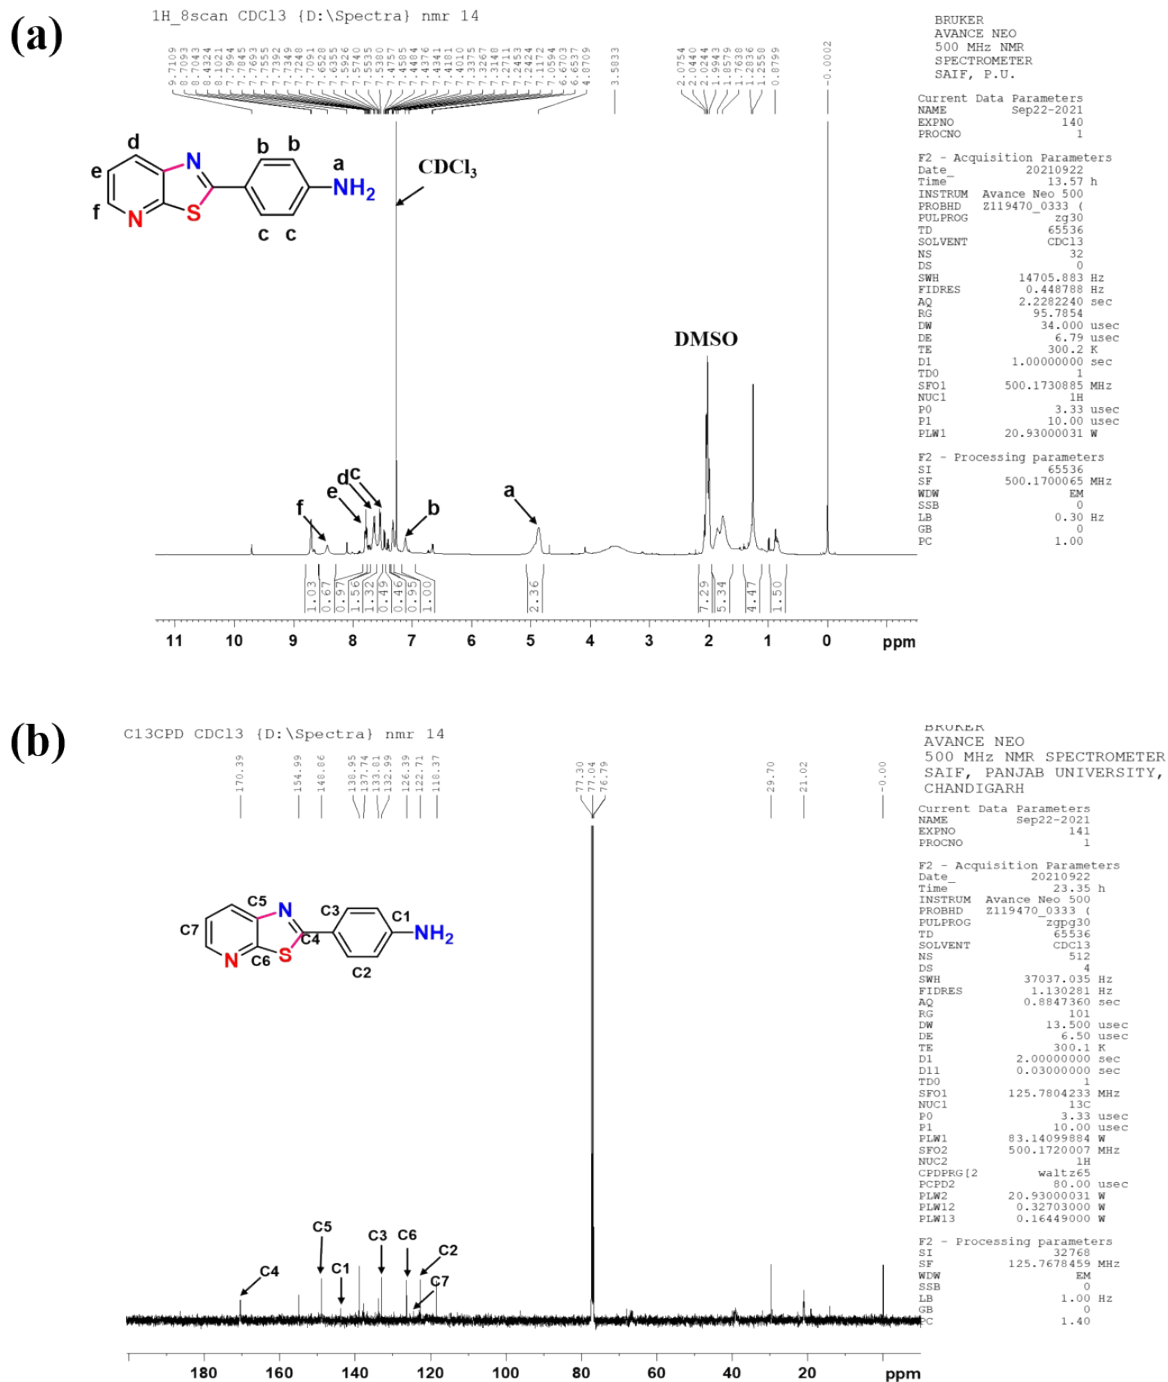

Figure S11. (a) <sup>1</sup>H NMR and (b) <sup>13</sup>C NMR of 4-(thiazolo[5,4-b] pyridin-2-yl) aniline.

(ii) <sup>1</sup>H NMR and <sup>13</sup>C NMR of 2-(4-(bromomethyl) phenyl) benzo[d]thiazol-7-amine

<sup>1</sup>H NMR (CDCl<sub>3</sub>, 500 MHz): 7.49-7.16 (d, 2H), 7.06-6.71 (d, 1H), 6.71-6.69 (d, 2H), 6.58-6.56 (s, 2H), 3.6 (s, 2H); <sup>13</sup>C NMR (CDCl<sub>3</sub>, 500 MHz): δ 148.64, 133.29, 130.01, 118.20, 115.77, 38.66.

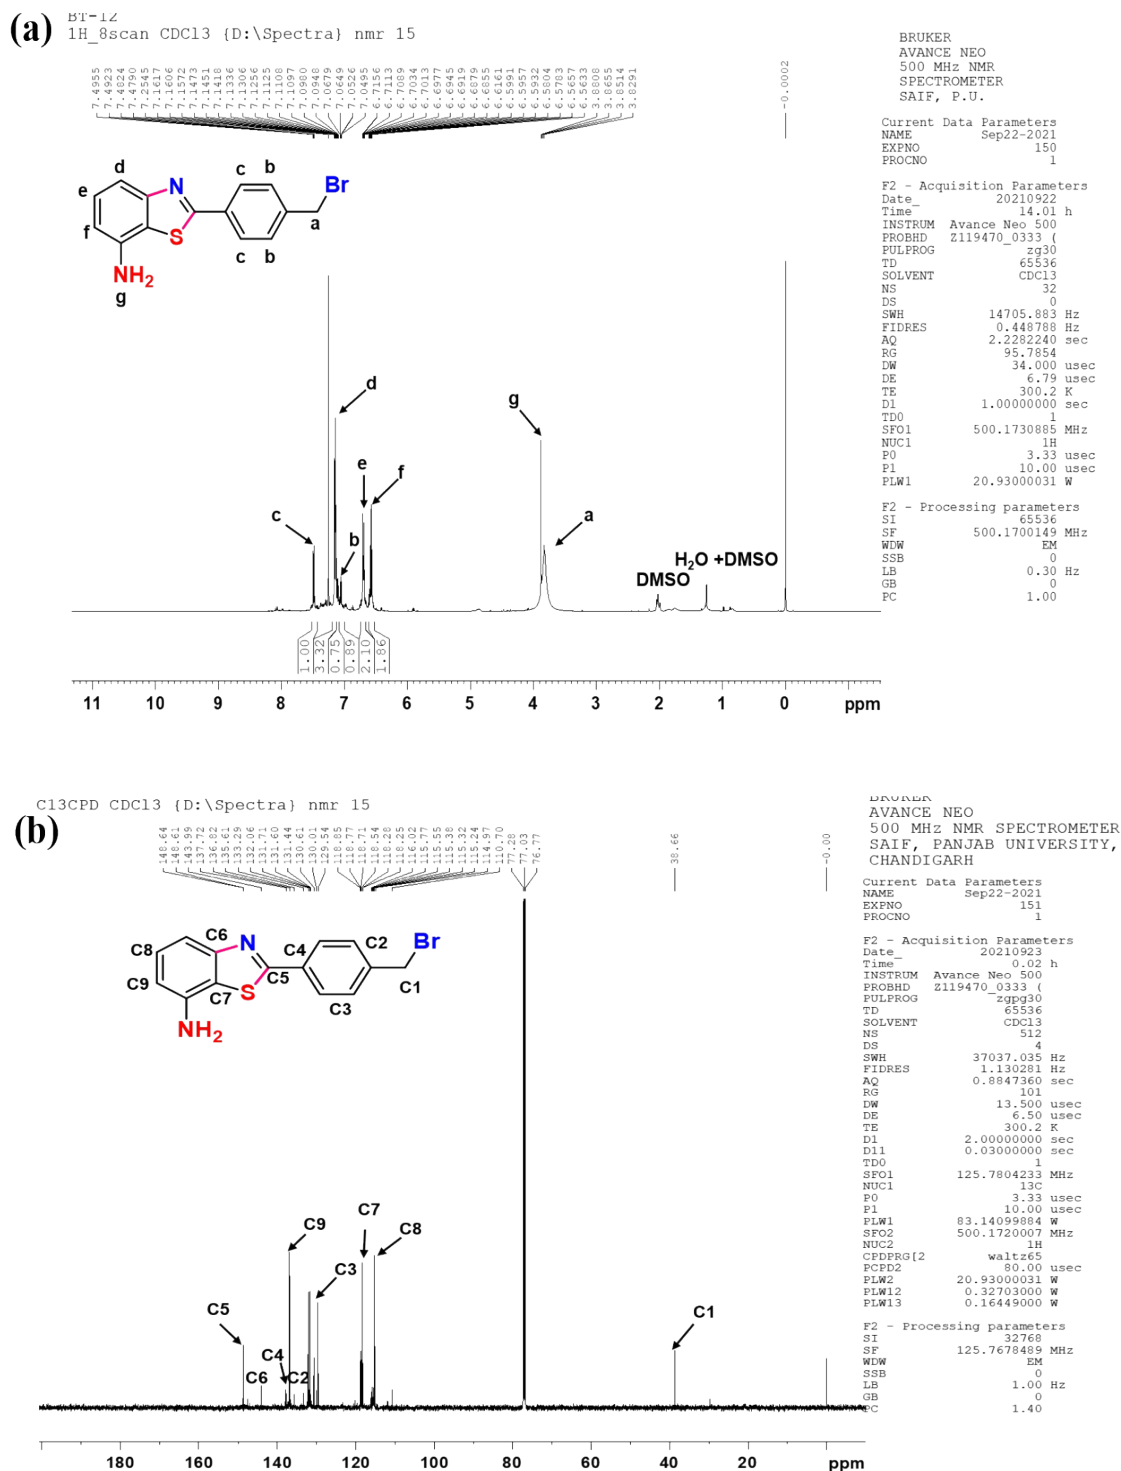

Figure S12.(a) <sup>1</sup>H NMR and (b) <sup>13</sup>C NMR of 2-(4-(bromomethyl) phenyl) benzo[d]thiazol-7-amine

(iii)  $^1\text{H}$  NMR and  $^{13}\text{C}$  NMR of 2-(4-(bromomethyl) phenyl) thiazolo [5,4-b] pyridine:

$^1\text{H}$  NMR ( $\text{CDCl}_3$ , 500 MHz): 8.19-8.17 (s, 1H), 7.77-7.75 (s, 1H), 7.48-7.47 (d, 2H), 4.47-4.40 (s, 2H);  $^{13}\text{C}$  NMR ( $\text{CDCl}_3$ , 500 MHz):  $\delta$  167.48, 157.31, 144.36, 130.93, 124.93, 33.69.

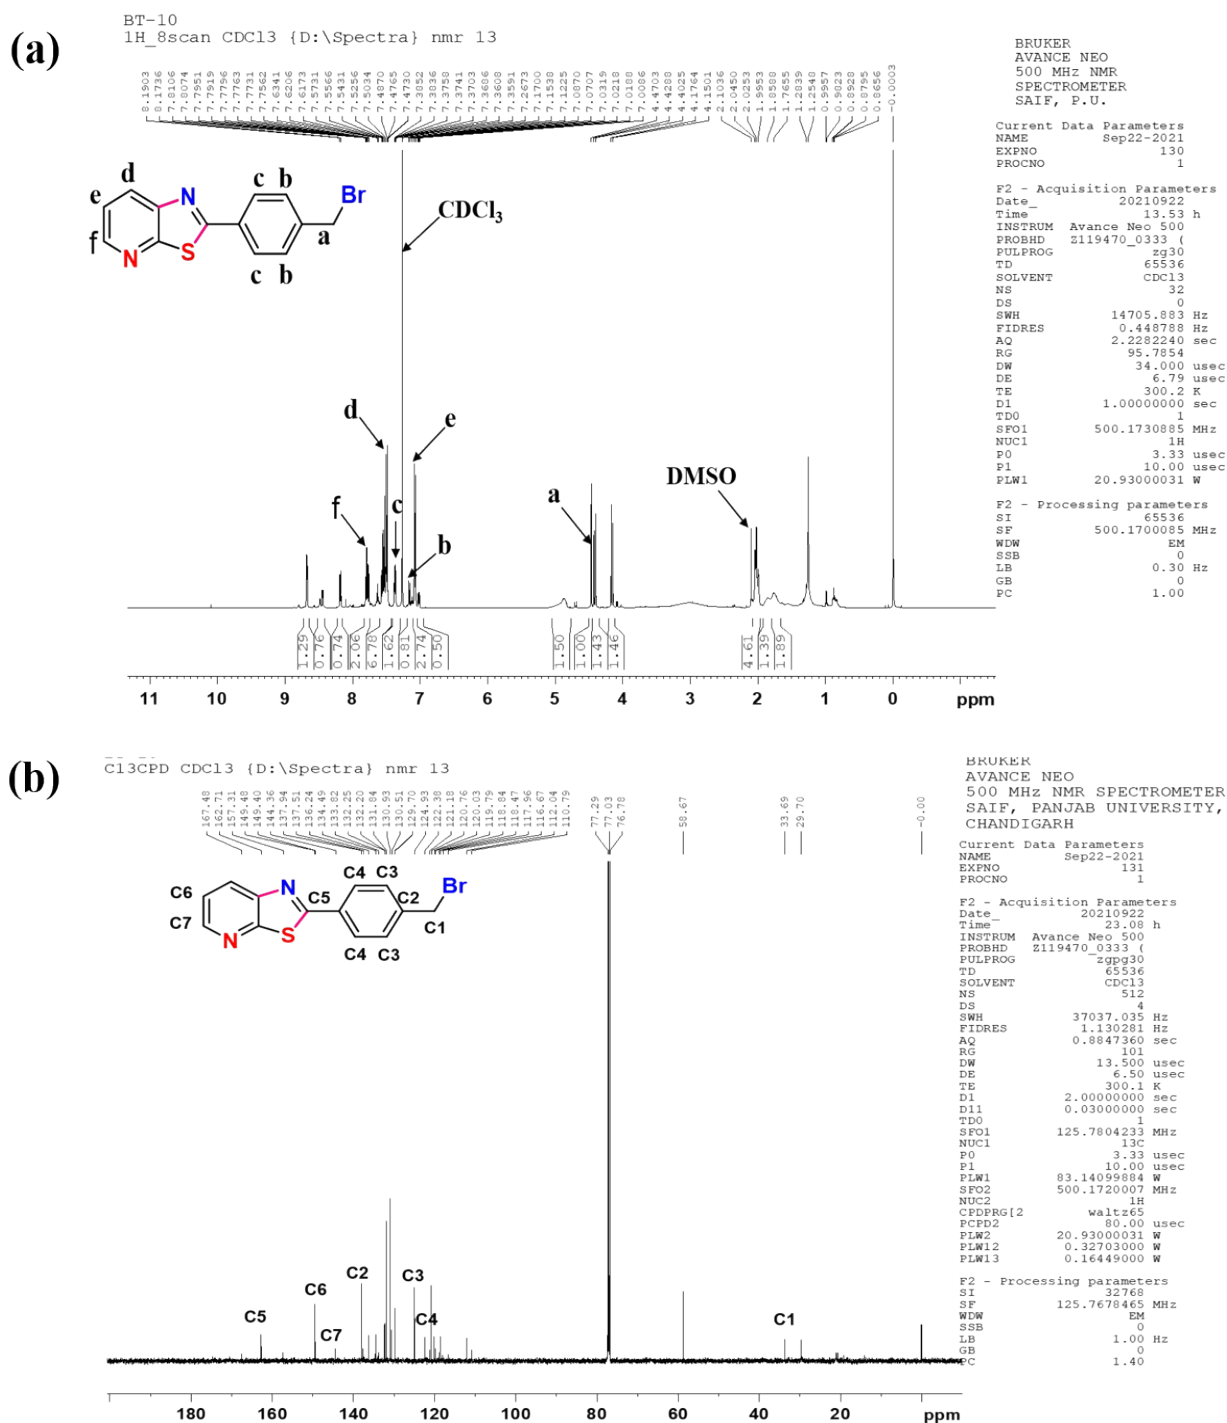

Figure S13.  $^1\text{H}$  NMR and  $^{13}\text{C}$  NMR of 2-(4-(bromomethyl) phenyl) thiazolo[5,4-b] pyridine.

#### 14. $R_f$ value and image of synthesized 2-Substituted BT compounds

(i)

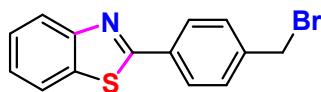

2-(4-(bromomethyl)phenyl)benzo[d]thiazole

$R_f$  value of starting material thiophenol = 0.82

$R_f$  value of starting material 4-(bromomethyl benzonitrile) = 0.83

$R_f$  value of final product 2-(4-(bromomethyl) phenyl) benzo[d]thiazole = 0.89

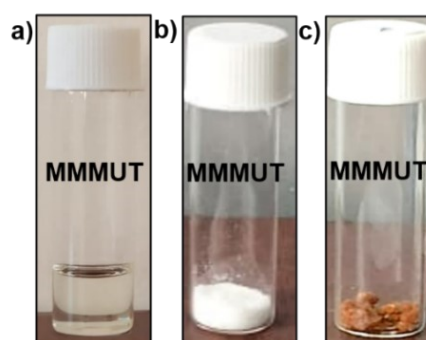

**Figure S14.** The sample image of (a) thiophenol (colourless liquid) (b) 4-(bromomethyl benzonitrile) (white crystal solid) (c) 2-Substituted BT (reddish brown solid).

(ii)

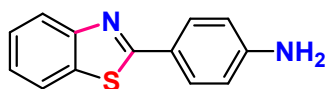

4-(benzo[d]thiazol-2-yl)aniline

$R_f$  value of starting material thiophenol = 0.82

$R_f$  value of starting material 4-aminobenzonitrile = 0.66

$R_f$  value of final product 4-(benzo[d]thiazol-2-yl) aniline = 0.88

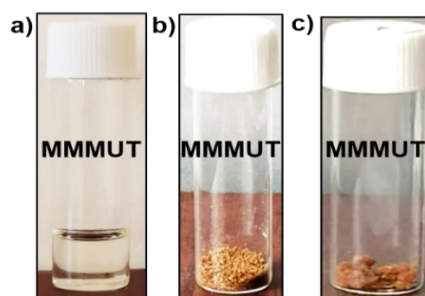

**Figure S15.** The image of (a) thiophenol (colourless liquid) (b) 4-aminobenzonitrile (brown powder solid) (c) 4-(benzo[d]thiazol-2-yl) aniline (brown crystal solid).

(iii)

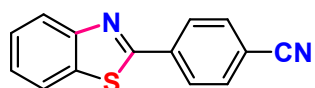

4-(benzo[d]thiazol-2-yl)benzonitrile

$R_f$  value of starting material thiophenol = 0.82

$R_f$  value of starting material 1,4-dicyanobenzene = 0.73

$R_f$  value of final product 4-(benzo[d]thiazol-2-yl) benzonitrile = 0.75

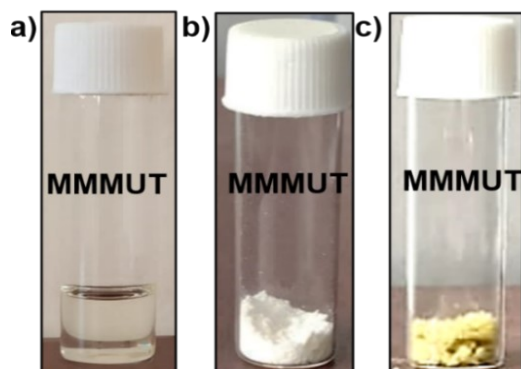

**Figure S16.** The image of (a) thiophenol (colourless liquid) (b) 1,4-dicyanobenzene (white solid) (c) 4-(benzo[d]thiazol-2-yl) benzonitrile (greenish solid).

(iv)

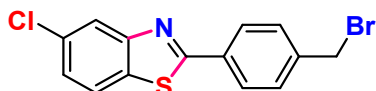

2-(4-(bromomethyl)phenyl)-5-chlorobenzo[d]thiazole

$R_f$  value of starting material 4-chlorothiophenol = 0.87

$R_f$  value of starting material 4-(bromomethyl) benzonitrile = 0.83

$R_f$  value of final product 2-(4-(bromomethyl) phenyl)-5-chlorobenzo[d]thiazole = 0.89



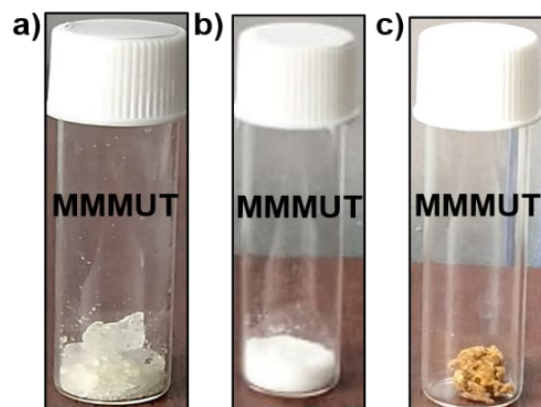

**Figure S17.** The image of (a) 4-chlorothiophenol (colorless solid) (b) 4-(bromomethyl benzonitrile) (white solid) (c) 2-(4-(bromomethyl) phenyl)-5-chlorobenzo[d]thiazole (brown solid).

(v)

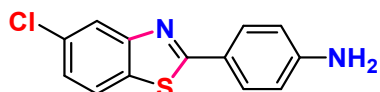

4-(5-chlorobenzo[d]thiazol-2-yl)aniline

$R_f$  value of starting material 4-chlorothiophenol = 0.87

$R_f$  value of 4-aminobenzonitrile = 0.66

$R_f$  value of final product 4-(5-chlorobenzo[d]thiazol-2-yl) aniline = 0.68

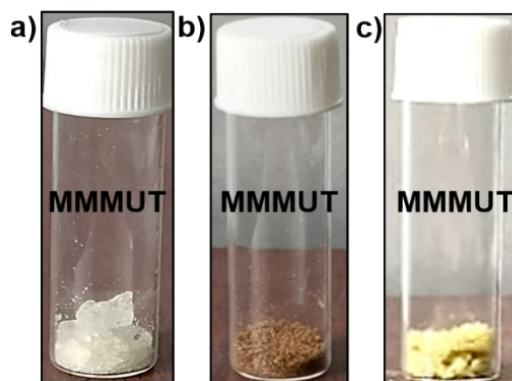

**Figure S18.** The image of (a) 4-chlorothiophenol (colourless solid) (b) 4-aminobenzonitrile (brown powder solid) (c) 4-(5-chlorobenzo[d]thiazol-2-yl) aniline (green solid).

(vi)

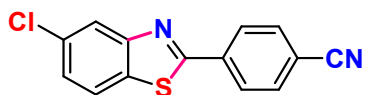

4-(5-chlorobenzothiazol-2-yl)benzonitrile

$R_f$  value of starting material 4-chlorothiophenol = 0.87

$R_f$  value of 1,4-dicyanobenzene = 0.73

$R_f$  value of final product 4-(5-chlorobenzothiazol-2-yl) benzonitrile = 0.89

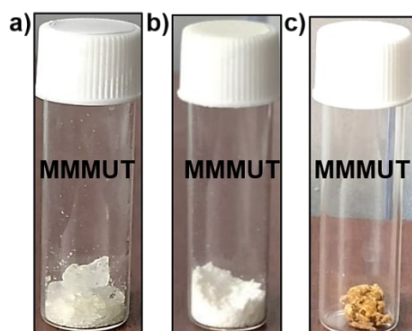

**Figure S19.** The image of (a) 4-chlorothiophenol (colourless solid) (b) 1,4-dicyanobenzene (white solid) (c) 4-(5-chlorobenzothiazol-2-yl) benzonitrile (brown solid).

(vii)

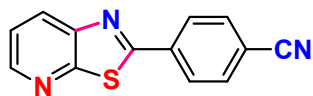

4-(thiazolo[5,4-*b*]pyridin-2-yl)benzonitrile

$R_f$  value of starting material 2-mercaptopyridine = 0.73

$R_f$  value of 1,4-dicyanobenzene = 0.73

$R_f$  value of final product 4-(thiazolo[5,4-*b*] pyridin-2-yl) benzonitrile = 0.80

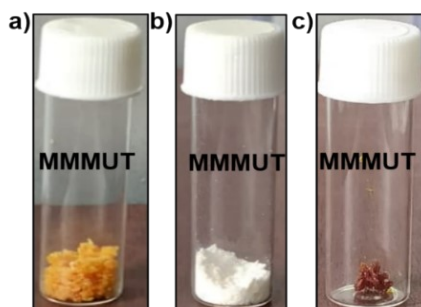

**Figure S20.** The image of (a) 2-mercaptopyridine (crystalline yellow solid) (b) 1,4-dicyanobenzene (white solid) (c) 4-(thiazolo[5,4-*b*] pyridin-2-yl) benzonitrile (crystalline reddish solid).

(viii)

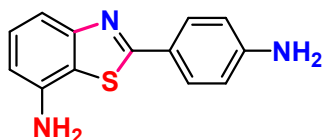

2-(4-aminophenyl)benzo[d]thiazol-7-amine

$R_f$  value of starting material 2-aminothiophenol (colourless oily solid) = 0.70

$R_f$  value of 4-aminobenzonitrile = 0.66

$R_f$  value of final product 2-(4-aminophenyl) benzo[d]thiazol-7-amine = 0.83

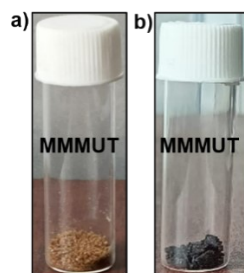

**Figure S21.** The image of (a) 4-aminobenzonitrile (brown powder solid) (b) 2-(4-aminophenyl) benzo[d]thiazol-7-amine (black solid).

(ix)

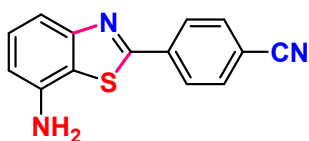

4-(7-aminobenzo[d]thiazol-2-yl)benzonitrile

$R_f$  value of starting material 2-aminothiophenol (colourless oily solid) = 0.70

$R_f$  value of 1,4-dicyanobenzene = 0.73

$R_f$  value of final product 4-(7-aminobenzo[d]thiazol-2-yl) benzonitrile = 0.67

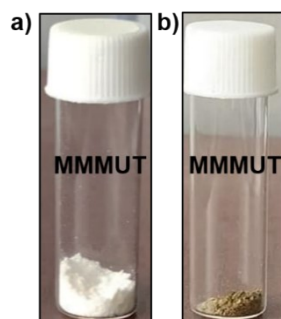

**Figure S22.** The image of (a) 1,4-dicyanobenzene (white solid) (b) 4-(7-aminobenzo[d]thiazol-2-yl) benzonitrile (grey solid).

## 15. References

1. S. H. Lee, D. H. Nam, J. H. Kim, J.-O. Baeg, C. B. Park, *Chem bio chem*2009, **10**(10), 1621-1624.
2. Y.-N. Gong, W. Zhong, Y. Li, Y. Qiu, L. Zheng, J. Jiang, H.-L. Jiang, *J. Am. Chem. Soc.* 2020, **142** (39), 16723–16731.
3. J. Meng, Y. Tian, C. Li, X. Lin, Z. Wang, L. Sun, Y. Zhou, J. Li, N. Yang, Y. Zong, F. Li, Y. Cao, H. Song, *Catal. Sci. Technol.*, 2019, **9**, 1911-1921.
4. D. Yadav, R. K. Yadav, A. Kumar, N.-J. Park, J.-O. Baeg, *ChemcatChem*,2016,**8**(21), 3389–3393.
5. C. B. Park, S. H. Lee, E. Subramanian, B. B. Kale, S. M. Lee, J.-O. Baeg, *Chemical Communications*2008, (42), 5423.
6. D. H. Nam, S. H. Lee, C. B. Park, *Small*,2010, **6**(8), 922–926.
7. P. Sekar, L. Calvillo, C. Tubaro, M. Baron, A. Pokle, F. Carraro, A. Martucci, S. Agnoli, *ACS Catal.* 2017, **7**, 11, 7695–7703.
8. K. Maeda, K. Sekizawa, O. Ishitani, *Chemical Communications*2013, **49**(86), 10127.
9. R. Kuriki, K. Sekizawa, O. Ishitani, K. Maeda, *Angewandte Chemie International Edition*, 2015 **54**(8), 2406–2409.
10. J. W. Ko, W. S. Choi, J. Kim, S. K. Kuk, S. H. Lee, C. B. Park, *Biomacromolecules* 2017, **18**(11), 3551–3556.
11. K. Iizuka, T. Wato, Y. Miseki, K. Saito, A. Kudo, *J. Am. Chem. Soc.* 2011, **133**(51), 20863–20868.
12. J. Chung, D. H. Won, J. Koh, E.-H. Kim, S. I. Woo, *Phys. Chem. Chem. Phys.*,2016,**18**, 6252-6258.
13. A.P. Côté, H. M. El-Kaderi, H. Furukawa, J. R. Hunt, and O.M. Yaghi, *Journal of the American Chemical Society*, 2007, v. 129, 12914–12915.
14. K. Anjali, L. K. Nishana, J. Christopher, and A. Sakthivel, *Journal of Porous Materials*, 2020, v. 27, 1191–1201.
15. W. Zhao, Z. Wu, Z. Fan, S. Xiang, *Journal of Liquid Chromatography & Related Technologies*, 41(9), 481–488.
16. Y. Wang, S. Wang, X. W. Lou, *Angew. Chem. Int. Ed.* 2019, 58, **48**, 17236-17240.
17. B. Su, L. Huang, Z. Xiong, Y. Yang, Y. Hou, Z. Ding and S. Wang, *J. Mater. Chem. A*,2019,**7**, 26877-26883.

18. Y. Ma, Y. Fang, X. Fu and X. Wang, *Sustainable Energy Fuels*, 2020,4, 5812-5817.
19. L. Huang, B. Li, B. Su, Z. Xiong, C. Zhang, Y. Hou, Z. Ding, S. Wang ,*J. Mater. Chem. A*,2020,**8**, 7177-7183.
